---

## Structural Bioinformatics

# DeepAffinity: Interpretable Deep Learning of Compound-Protein Affinity through Unified Recurrent and Convolutional Neural Networks

Mostafa Karimi<sup>1,2</sup>, Di Wu<sup>1</sup>, Zhangyang Wang<sup>3</sup> and Yang shen<sup>1,2,\*</sup>

<sup>1</sup>Department of Electrical and Computer Engineering, <sup>2</sup>TEES-AgrLife Center for Bioinformatics and Genomic Systems Engineering, and <sup>3</sup>Department of Computer Science and Engineering, Texas A&M University, College Station, 77843, USA.

\*To whom correspondence should be addressed.

Associate Editor: XXXXXXX

Received on XXXXX; revised on XXXXX; accepted on XXXXX

### Abstract

**Motivation:** Drug discovery demands rapid quantification of compound-protein interaction (CPI). However, there is a lack of methods that can predict compound-protein affinity from sequences alone with high applicability, accuracy, and interpretability.

**Results:** We present a seamless integration of domain knowledges and learning-based approaches. Under novel representations of structurally-annotated protein sequences, a semi-supervised deep learning model that unifies recurrent and convolutional neural networks has been proposed to exploit both unlabeled and labeled data, for jointly encoding molecular representations and predicting affinities. Our representations and models outperform conventional options in achieving relative error in  $IC_{50}$  within 5-fold for test cases and 10-fold for protein classes not included for training. Performances for new protein classes with few labeled data are further improved by transfer learning. Furthermore, an attention mechanism is embedded to our model to add to its interpretability, as illustrated in case studies for predicting and explaining selective drug-target interactions.

**Availability:** <https://github.com/Shen-Lab/DeepAffinity>

**Contact:** [yshen@tamu.edu](mailto:yshen@tamu.edu)

**Supplementary information:** Supplementary data are available at <http://shen-lab.github.io/deep-affinity-bioinf18-supp.pdf>.

---

## 1 Introduction

Drugs are often developed to target proteins that participate in many cellular processes. Among almost 900 FDA-approved drugs as of year 2016, over 80% are small-molecule compounds that act on proteins for drug effects (Santos *et al.*, 2017). Clearly, it is of critical importance to characterize compound-protein interaction for drug discovery and development, whether screening compound libraries for given protein targets to achieve desired effects or testing given compounds against possible off-target proteins to avoid undesired effects. However, experimental characterization of every possible compound-protein pair can be daunting, if not impossible, considering the enormous chemical and proteomic spaces. Computational prediction of compound-protein interaction (CPI) has therefore made much progress recently, especially for repurposing and repositioning known drugs for previously unknown but desired new targets (Keiser *et al.*, 2009; Power *et al.*, 2014) and for anticipating compound side-effects or even toxicity due to interactions with off-targets or other drugs (Chang *et al.*, 2010; Mayr *et al.*, 2016).

Structure-based methods can predict compound-protein affinity, i.e., how active or tight-binding a compound is to a protein; and their results are highly interpretable. This is enabled by evaluating energy models (Gilson and Zhou, 2007) on 3D structures of protein-compound complexes. As these structures are often unavailable, they often need to be first predicted by "docking" individual structures of proteins and compounds together before their energies can be evaluated, which tends to be a bottleneck for computational speed and accuracy (Leach *et al.*, 2006). Machine learning has been used to improve scoring accuracy based on energy features (Ain *et al.*, 2015).

More recently, deep learning has been introduced to predict compound activity or binding-affinity from 3D structures directly. Wallach *et al.* developed AtomNet, a deep convolutional neural network (CNN), for modeling bioactivity and chemical interactions (Wallach *et al.*, 2015). Gomes *et al.* (Gomes *et al.*, 2017) developed atomic convolutional neural network (ACNN) for binding affinity by generating new pooling and convolutional layers specific to atoms. Jimenez *et al.* (Jimenez *et al.*, 2018) also used 3D CNN with molecular representation of 3D voxels assigned to various physicochemical property channels. Besides these 3D CNN

methods, Cang and Wei represented 3D structures in novel 1D topology invariants in multiple channels for CNN (Cang and Wei, 2017). These deep learning methods often improve scoring thanks to modeling long-range and multi-body atomic interactions. Nevertheless, they still rely on actual 3D structures of CPI and remain largely untested on lower-quality structures predicted from docking, which prevents large-scale applications.

Sequence-based methods overcome the limited availability of structural data and the costly need of molecular docking. Rather, they exploit rich omics-scale data of protein sequences, compound sequences (e.g. 1D binary substructure fingerprints (Wang *et al.*, 2009)) and beyond (e.g. biological networks). However, they have been restricted to classifying CPIs (Chen *et al.*, 2016) mainly into two types (binding or not) and occasionally more (e.g., binding, activating, or inhibiting (Wang and Zeng, 2013)). And more importantly, their interpretability is rather limited due to high-level features. Earlier sequence-based machine learning methods are based on shallow models for supervised learning, such as support vector machines, logistic regression, random forest, and shallow neural networks (Cheng *et al.*, 2012; Yu *et al.*, 2012; Tabei and Yamanishi, 2013; Shi *et al.*, 2013; Cheng *et al.*, 2016). These shallow models are not lack of interpretability *per se*, but the sequence-based high-level features do not provide enough interpretability for mechanistic insights on why a compound-protein pair interacts or not.

Deep learning has been introduced to improve CPI identification from sequence data and shown to outperform shallow models. Wang and Zeng developed a method to predict three types of CPI based on restricted Boltzmann machines, a two-layer probabilistic graphical model and a type of building block for deep neural networks (Wang and Zeng, 2013). Tian *et al.* boosted the performance of traditional shallow-learning methods by a deep learning-based algorithm for CPI (Tian *et al.*, 2016). Wan *et al.* exploited feature embedding algorithm such as latent semantic algorithm (Deerwester *et al.*, 1990) and word2vec (Mikolov *et al.*, 2013) to automatically learn low-dimensional feature vectors of compounds and proteins from the corresponding large-scale unlabeled data (Wan and Zeng, 2016). Later, they trained deep learning to predict the likelihood of their interaction by exploiting the learned low-dimensional feature space. However, these deep-learning methods inherit from sequence-based methods two limitations: simplified task of predicting whether rather than how active CPIs occur as well as low interpretability due to the lack of fine-resolution structures. In addition, interpretability for deep learning models remains a challenge albeit with fast progress especially in a model-agnostic setting (Ribeiro *et al.*, 2016; Koh and Liang, 2017).

As has been reviewed, structure-based methods predict quantitative levels of CPI in a realistic setting and are highly interpretable with structural details. But their applicability is restricted by the availability of structure data, and the molecular docking step makes the bottleneck of their efficiency. Meanwhile, sequence-based methods often only predict binary outcomes of CPI in a simplified setting and are less interpretable in lack of mechanism-revealing features or representations; but they are broadly applicable with access to large-scale omics data and generally fast with no need of molecular docking.

Our goal is to, realistically, predict quantitative levels of CPIs (compound-protein affinity measured in  $IC_{50}$ ,  $K_i$ , or  $K_d$ ) from sequence data alone and to balance the trade-offs of previous structure- or sequence-based methods for broad applicability, high throughput and more interpretability. From the perspective of machine learning, this is a much more challenging regression problem compared to the classification problem seen in previous sequence-based methods.

To tackle the problem, we have designed interpretable yet compact data representations and introduced a novel and interpretable deep learning framework that takes advantage of both unlabeled and labeled data. Specifically, we first have represented compound sequences in the Simplified Molecular-Input Line-Entry System (SMILES)

format (Weininger, 1988) and protein sequences in novel alphabets of structural and physicochemical properties. These representations are much lower-dimensional and more informative compared to previously-adopted small-molecule substructure fingerprints or protein Pfam domains (Tian *et al.*, 2016). We then leverage the wealth of abundant unlabeled data to distill representations capturing long-term, nonlinear dependencies among residues/atoms in proteins/compounds, by pre-training bidirectional recurrent neural networks (RNNs) as part of the seq2seq auto-encoder that finds much success in modeling sequence data in natural language processing (Kalchbrenner and Blunsom, 2013). Lastly we develop a novel deep learning model unifying RNNs and convolutional neural networks (CNNs), to be trained from end to end (Wang *et al.*, 2016b) using labeled data for task-specific representations and predictions. Moreover, we introduce attention mechanism to interpret predictions by isolating main contributors of molecular fragments, which is further exploited for predicting binding sites and origins of binding specificity.

The overall pipeline of our unified RNN-CNN method for semi-supervised learning (data representation, unsupervised learning, and joint supervised learning) is illustrated in Fig. 1 with details given next.

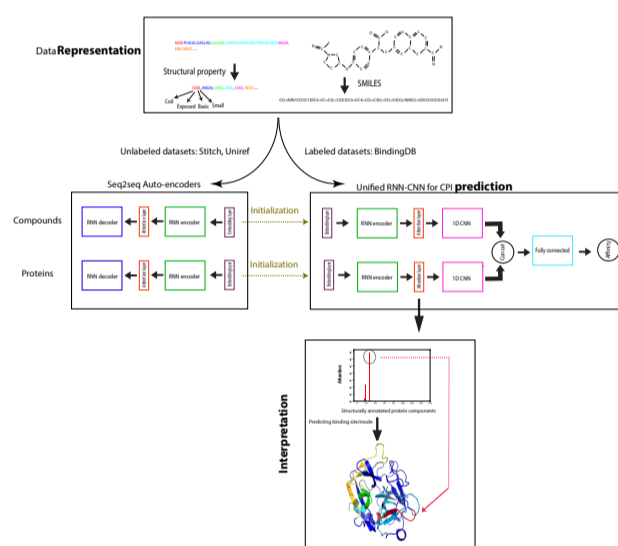

Fig. 1. The pipeline of our unified RNN-CNN method to predict compound-protein affinity.

## 2 Materials and Methods

### 2.1 Data

We used molecular data from three public datasets: labeled compound-protein binding data from BindingDB (Liu *et al.*, 2006), compound data in the SMILES format from STITCH (Kuhn *et al.*, 2007) and protein amino-acid sequences from UniRef (Suzek *et al.*, 2014).

From 413,635  $IC_{50}$ -labeled samples collected from BindingDB, we completely excluded three classes of proteins from the training set: estrogen receptors (ER; 4,037 samples), G-protein-coupled receptors (GPCR; 1,072 samples) and ion channels (5,197 samples), to test the generalizability of our framework. And we randomly split the rest into the training (282,442 samples including 10% held out for validation) and the default test set (120,887 samples) without the aforementioned three classes of protein targets. Similarly, we split a  $K_i$  ( $K_d$ ) labeled dataset into 124,871 (11,419) samples for training, 53,591 (4,772) for testing, 724 (14) for ERs, 825 (131) for ion channels, and 165 (0) for GPCRs. All labels are in logarithm forms:  $pIC_{50}$ ,  $pK_i$ , and  $pK_d$ . More details can be found in Sec. 1.1 of Supplementary Data.

For unlabeled compound data from STITCH, we randomly chose 500K samples for training and 500K samples for validation (sizes were restricted

due to computing resources) and then removed those whose SMILES string lengths are above 100, resulting in 499,429 samples for training and 484,481 for validation. For unlabeled protein data from UniRef, we used all UniRef50 samples (50% sequence-identity level) less those of lengths above 1,500, resulting in 120,000 for training and 50,525 for validation.

## 2.2 Input data representation

Only 1D sequence data are assumed available. 3D structures of proteins, compounds, or their complexes are not used.

### 2.2.1 Compound data representation

**Baseline representation.** A popular compound representation is based on 1D binary substructure fingerprints from PubChem (Wang *et al.*, 2009). Mainly, basic substructures of compounds are used as fingerprints by creating binary vectors of 881 dimensions.

**SMILES representation.** We used SMILES strings (Weininger, 1988) to represent compounds in our algorithm. SMILES is a short ASCII string to represent compound chemical structures based on bonds and rings between atoms. Compared to the baseline representation which uses  $k$ -hot encoding, canonical SMILES strings fully and uniquely determine chemical structures and are yet much more compact.

### 2.2.2 Protein data representation

**Baseline representation.** Previously the most common protein representation for CPI classification was a 1D binary vector whose dimensions correspond to thousands of (5,523 in (Tian *et al.*, 2016)) Pfam domains (Finn *et al.*, 2014) (structural units) and 1's are assigned based on  $k$ -hot encoding (Tabei and Yamanishi, 2013; Cheng *et al.*, 2016). We considered all types of Pfam entries (family, domain, motif, repeat, disorder, and coiled coil) for better coverage of structural descriptions, which leads to 16,712 entries (Pfam 31.0) as features. Protein sequences are queried in batches against Pfam using the web server HMMER (hmmscan) (Finn *et al.*, 2015) with the default gathering threshold.

**Structural property sequence (SPS) representation.** Although 3D structure data of proteins is often a luxury and their prediction remains a challenge without templates, it has been of much progress to predict protein structural properties from sequences (Cheng *et al.*, 2005; Magnan and Baldi, 2014; Wang *et al.*, 2016a). We used SSPro/ACCPro (Magnan and Baldi, 2014) to predict secondary structure class ( $\alpha$ -helix,  $\beta$ -strand, and coil) and solvent accessibility (exposed or not) for each residue and group neighboring residues of the same secondary structure class into secondary structure elements (SSEs). The details and the pseudo-code for SSE are in Supplementary Data (Algorithm 1).

Each SSE is further classified: solvent exposed if at least 30% of residues are and buried otherwise; polar, non-polar, basic or acidic based on the highest odds (for each type, occurrence frequency in the SSE is normalized by background frequency seen in all protein sequences to remove the effect from group-size difference); short if length  $L \leq 7$ , medium if  $7 < L \leq 15$ , and long if  $L > 15$ . In this way, we defined 4 "alphabets" of 3, 2, 4 and 3 "letters", respectively to characterize SSE category, solvent accessibility, physicochemical characteristics, and length (Table S2) and combined letters from the 4 alphabets in the order above to create 72 "words" (4-tuples) to describe SSEs. Pseudo-code for the protein representation is shown as Algorithm 2 in Supplementary Data. 4 more special symbols are introduced for the beginning or the end of a sequence, padding (to align sequences in the same batch), or not-used ones.

The SPS representation overcomes drawbacks of Pfam-based baseline representation: it provides higher resolution of sequence and structural details for more challenging regression tasks, more distinguishability among proteins in the same family, and more interpretability on which protein segments (SSEs here) are responsible for predicted affinity. All these are achieved with a much smaller alphabet of size 76, which leads to

around 100-times more compact representation of a protein sequence than the baseline. In addition, the SPS sequences are much shorter than amino-acid sequences and prevents convergence issues when training RNN and LSTM for sequences longer than 1,000 (Li *et al.*, 2018).

## 2.3 RNN for unsupervised pre-training

We encode compound SMILES or protein SPS into representations, first by unsupervised deep learning from abundant unlabeled data. We used a recurrent neural network (RNN) model, seq2seq (Sutskever *et al.*, 2014), that has seen much success in natural language processing and was recently applied to embedding compound SMILES strings into fingerprints (Xu *et al.*, 2017). A Seq2seq model is an auto-encoder that consists of two recurrent units known as the encoder and the decoder, respectively (see the corresponding box in Fig. 1). The encoder maps an input sequence (SMILES/SPS in our case) to a fixed-dimension vector known as the thought vector. Then the decoder maps the thought vector to the target sequence (again, SMILES/SPS here). We choose gated recurrent unit (GRU) (Cho *et al.*, 2014) as our default seq2seq model and treat the thought vectors as the representations learned from the SMILES/SPS inputs. The detailed GRU configuration and advanced variants (bucketing, bidirectional GRU, and attention mechanism which provides a way to "focus" for encoders) can be found in Sec. 1.4 of Supplementary Data.

Through unsupervised pre-training, the learned representations capture nonlinear joint dependencies among protein residues or compound atoms that are far from each other in sequence. Such "long-term" dependencies are very important to CPIs since corresponding residues or atoms can be close in 3D structures and jointly contribute to intermolecular interactions.

## 2.4 Unified RNN-CNN for supervised learning

With compound and protein representations learned from the above unsupervised learning, we solve the regression problem of compound-protein affinity prediction using supervised learning. For either proteins or compounds, we append a CNN after the RNN (encoders and attention models only) that we just trained. The CNN model consists of a one-dimensional (1D) convolution layer followed by a max-pooling layer. The outputs of the two CNNs (one for proteins and the other for compounds) are concatenated and fed into two more fully connected layers.

The entire RNN-CNN pipeline is trained from end to end (Wang *et al.*, 2016b), with the pre-trained RNNs serving as warm initializations, for improved performance over two-step training. The pre-trained RNN initializations prove to be very important for the non-convex training process (Sutskever *et al.*, 2013). In comparison to such a "unified" model, we also include the "separate" RNN-CNN baseline for comparison, in which we fixed the learned RNN part and train CNN on top of its outputs.

We have also introduced attention mechanism to unified RNN-CNN models. The goal is to both improve predictive performances and enable model interpretability at the level of "letters" (SSEs in proteins and atoms in compounds). Attention models (for proteins and compounds) are jointly trained with the RNN encoder and the CNN part. Learned parameters of theirs include attention weights on all "letters" for a given string. Compared to that in unsupervised learning, the attention model here outputs a single vector as the input to the subsequent 1D-CNN model.

More details can be found in Sec. 1.5 of Supplementary Data.

# 3 Results and Discussion

## 3.1 Compound and protein representations

We compared the auto-encoding performances of our vanilla seq2seq model and 4 variants: bucketing, bi-directional GRU ("fw+bw"), attention mechanism, and attention mechanism with fw+bw, respectively, in Tables S3 and S4 (Supplementary Data). We used the common assessment metric in language models, perplexity, which is related to the entropy  $H$  of

modeled probability distribution  $P$  ( $\text{Perp}(P) = 2^{H(P)} \geq 1$ ). First, the vanilla seq2seq model had lower test-set perplexity for compound SMILES than protein SPS (6.83 versus 41.03), which echoes the fact that compound SMILES strings are defined in an alphabet of less letters (45 versus 152) and its model is easier to learn. Second, bucketing, the most ad-hoc option among all, did not improve the results much. Third, whereas bi-directional GRUs and attention mechanism each could lower perplexity by about 2~3.5 folds for compounds or proteins (except that attention mechanism alone drastically improved protein perplexity from 41.03 to 1.001), they together achieved the best performances (perplexity being 1.0001 for compound SMILES and 1.001 for protein SPS).

Therefore, the last seq2seq variant, bidirectional GRUs with attention mechanism, is regarded the most appropriate one for learning compound/protein representations and adopted thereafter.

## 3.2 Compound-protein affinity prediction

### 3.2.1 Comparing novel representations to baseline ones

To assess how useful the learned/encoded protein and compound representations are for predicting compound-protein affinity, we compared the novel and baseline representations in affinity regression using the labeled datasets. The representations were compared under the same shallow machine learning models — ridge & lasso regression and random forest (RF). From Table 1 we found that our novel representations learned from SMILES/SPS strings by seq2seq models outperform baseline representations of  $k$ -hot encoding of molecular/Pfam features. For the best performing random forest models, using 40% less training time and 20% less memory, the novel representations achieved roughly the same performance over the default test set as the baseline ones and significantly lowered root mean squared errors (RMSE) for two of the three generalization sets whose target protein classes (estrogen receptors / ER and ion channels) are not included in the training set. Similar improvements were observed on  $K_i$  and  $K_d$  predictions in Tables S5 and S7 (Supplementary Data), respectively. These results show that learning protein and compound representations from even unlabeled datasets alone could improve their context-relevance for various labels.

|                   | Baseline representations |             |                    | Novel representations |                    |                    |
|-------------------|--------------------------|-------------|--------------------|-----------------------|--------------------|--------------------|
|                   | Ridge                    | Lasso       | RF                 | Ridge                 | Lasso              | RF                 |
| Training          | 1.08 (0.63)              | 1.11 (0.61) | 0.70 (0.87)        | 1.13 (0.60)           | 1.13 (0.60)        | <b>0.64</b> (0.90) |
| Testing           | 1.10 (0.60)              | 1.13 (0.58) | <b>0.87</b> (0.78) | 1.13 (0.58)           | 1.13 (0.57)        | <b>0.87</b> (0.78) |
| ER                | 1.54 (0.33)              | 1.54 (0.30) | 1.53 (0.43)        | <b>1.33</b> (0.43)    | <b>1.33</b> (0.41) | 1.36 (0.48)        |
| Ion Channel       | 1.07 (0.33)              | 1.09 (0.20) | 1.17 (0.10)        | 1.02 (0.42)           | 1.04 (0.40)        | <b>0.97</b> (0.45) |
| GPCR              | 1.25 (0.62)              | 1.26 (0.57) | <b>1.17</b> (0.59) | 1.36 (0.30)           | 1.37 (0.28)        | 1.20 (0.64)        |
| Time (core hours) | 4.0                      | 6.97        | 1571.6             | 0.41                  | 3.05               | 974.6              |
| Memory (Gb)       | 7.6                      | 7.6         | 8.2                | 7.7                   | 7.7                | 6.4                |

Table 1. Comparing the novel representations to the baseline based on RMSE (and Pearson correlation  $R$ ) of pIC<sub>50</sub> shallow regression.

### 3.2.2 Comparing shallow and deep models

Using the novel representations we next compared the performances of affinity regression between the best shallow model (random forest) and various deep models. For both separate and unified RNN-CNN models, we tested results from a single model with (hyper)parameters optimized over the training/validation set, averaging a “parameter ensemble” of 10 models derived in the last 10 epochs, and averaging a “parameter+NN” ensemble of models with varying number of neurons in the fully connected layers ((300,100),(400,200) and (600,300)) trained in the last 10 epochs.

From Table 2 we noticed that unified RNN-CNN models outperform both random forest and separate RNN-CNN models (their similar performances indicated a potential to further improve RNN-CNN models with deeper models). By using a relatively small amount of labeled data (which are usually expensive and limited), protein and compound representations learned from abundant unlabeled data can be tuned to

be more task-specific. We also noticed that averaging an ensemble of unified RNN-CNN models further improves the performances especially for some generalization sets of ion channels and GPCRs. As anticipated, averaging ensembles of models reduces the variance originating from network architecture and parameter optimization thus reduces expected generalization errors. Similar observations were made for  $K_i$  and  $K_d$  predictions as well (Tables S6 and S8 in Supplementary data) even when their hyper-parameters were not particularly optimized and simply borrowed from IC<sub>50</sub> models. Impressively, unified RNN-CNN models without very deep architecture could predict IC<sub>50</sub> values with relative errors below  $10^{0.7}=5$  fold (or 1.0 kcal/mol) for the test set and even below 10 fold (or 1.5 kcal/mol) for protein classes not seen in the training set.

### 3.2.3 Unraveling key features of proteins in deep models

To interpret the unified RNN-CNN models’ predictive behaviors in the generalization sets, we examined attention weights or scores ( $\alpha_j$ ’s for protein SSE  $j$ ) from attention models of the single model. For estrogen receptors,  $\alpha$  helices and coils as well as polar residues were much more focused on, which agrees with the fact that its helix 12 and neighboring loop are binding sites for cofactors and drugs. For GPCRs which represent a more diverse class, although the 7-helical transmembrane proteins’ secondary structures are mostly  $\alpha$  helices, much attention was still paid to  $\beta$  strands and coils which are secondary structures of known extracellular drug binding site especially for class A GPCRs. More details and results are in Sec. 3 of Supplementary Data. More in-depth interpretability studies will be discussed on selective drugs in Sec. 3.4.

### 3.2.4 Deep transfer learning for new classes of protein targets

Using the generalization sets, we proceed to explain and address our unified RNN-CNN models’ relatively worse performances for new classes of protein targets without any training data. We first noticed that proteins in various sets have different distributions in SPS words. In particular, the testing set, ion channels, GPCRs, and estrogen receptors are increasingly different from the training set (measured by Jensen-Shannon distances), which correlated with increasingly deteriorating performance relative to the training set (measured by the relative difference in RMSE) with a Pearson correlation coefficient of 0.84 (Fig. S4 in Supplementary Data).

To improve the performances for new classes of proteins, we compare two strategies: re-training shallow models (random forest) from scratch based on new training data alone and “transferring” original deep models (unified parameter+NN ensemble) to fit new data (details in Supplementary Data). The reason is that new classes of targets often have few labeled data that might be adequate for re-training class-specific shallow models from scratch but not for deep models with much more parameters.

As shown in Fig. 2, deep transfer learning models increasingly improved the predictive performance compared to the original deep learning models, when increasing amount of labeled data for new protein classes are made available. The improvement was significant even with 1% training coverage for estrogen receptors and ion channels (only 40 and 51 training examples, respectively) but not for GPCR with just 10 examples. Notably, deep transfer learning models outperformed random forest models that were re-trained specifically for each new protein class.

## 3.3 Predicting target selectivity of drugs

We went on to test how well our unified RNN-CNN models could predict certain drugs’ target selectivity, using 3 sets of drug-target interactions (including 1 in Supplementary Data) of increasing prediction difficulty. Our novel representations and models successfully predicted all target selectivities whereas baseline representations and the shallow model random forest failed some.

|                              | RF                 | Separate RNN-CNN Models |                    |                       | Unified RNN-CNN Models |                    |                       |
|------------------------------|--------------------|-------------------------|--------------------|-----------------------|------------------------|--------------------|-----------------------|
|                              |                    | single                  | parameter ensemble | parameter+NN ensemble | single                 | parameter ensemble | parameter+NN ensemble |
| Training                     | 0.64 (0.90)        | 0.60 (0.92)             | 0.56 (0.93)        | 0.52 (0.93)           | 0.47 (0.94)            | 0.45 (0.94)        | <b>0.42</b> (0.95)    |
| Testing                      | 0.87 (0.78)        | 0.89 (0.76)             | 0.87 (0.78)        | 0.84 (0.79)           | 0.74 (0.84)            | 0.73 (0.84)        | <b>0.71</b> (0.86)    |
| Generalization – ER          | <b>1.36</b> (0.48) | 1.40 (0.17)             | 1.48 (0.22)        | 1.42 (0.28)           | 1.43 (0.38)            | 1.44 (0.37)        | 1.47 (0.34)           |
| Generalization – Ion Channel | <b>0.97</b> (0.45) | 1.05 (0.33)             | 1.03 (0.34)        | 1.02 (0.42)           | 1.07 (0.36)            | 1.06 (0.37)        | <b>0.97</b> (0.45)    |
| Generalization – GPCR        | 1.20 (0.64)        | 1.18 (0.48)             | 1.15 (0.54)        | 1.19 (0.59)           | 1.01 (0.76)            | 1.01 (0.74)        | <b>0.93</b> (0.78)    |

Table 2. Under novel representations learned from seq2seq, comparing random forest and variants of separate RNN-CNN and unified RNN-CNN models based on RMSE (Pearson correlation  $R$ ) for  $pIC_{50}$  prediction.

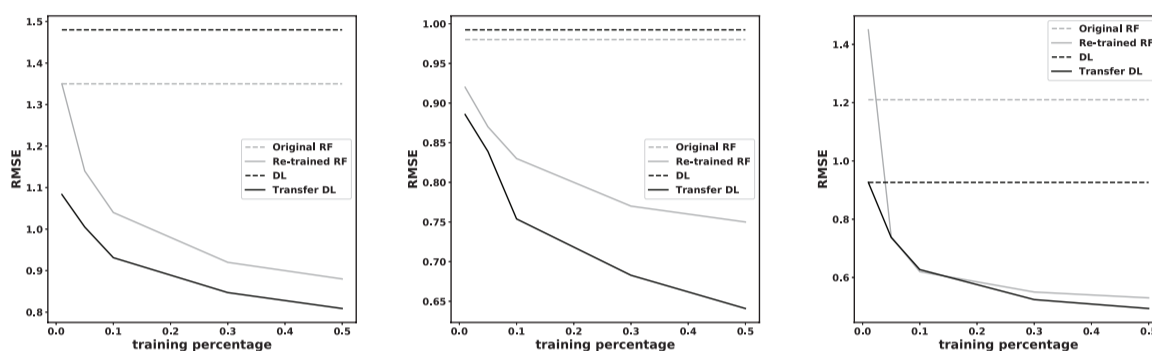

Fig. 2. Comparing original random forest (RF) and original param.+NN ensemble of unified RNN-CNN models (DL for deep learning) to re-trained RF and transfer DL using incremental amounts of each generalization set: (Left) ER; (Central) Ion Channel; (Right): GPCR.

### 3.3.1 Factor Xa versus Thrombin

Thrombin and factor X (Xa) are important proteins in the blood coagulation cascade. Antithrombotics, inhibitors for such proteins, have been developed to treat cardiovascular diseases. Due to thrombin's other significant roles in cellular functions and neurological processes, it is desirable to develop inhibitors specifically for factor Xa. DX-9065a is such a selective inhibitor ( $pK_i$  value being 7.39 for Xa and  $<2.70$  for thrombin) (Brandstetter *et al.*, 1996).

|           | Baseline rep. + RF | Novel rep. + RF | Novel rep. + DL |
|-----------|--------------------|-----------------|-----------------|
| Thrombin  | 8.78               | 8.72            | 8.30            |
| Factor Xa | <b>9.35</b>        | <b>9.42</b>     | <b>9.13</b>     |

Table 3. Predicted  $pIC_{50}$  values and target specificity for compound DX-9065a interacting with human factor Xa and thrombin.

Thrombin was not included in the training set whereas Xa was with 1,524 examples excluding DX-9065a. Table 3 suggested that all three models – random forest using baseline representations, random forest using our novel representations, and our unified RNN-CNN models using novel representations – correctly predicted the compound's favoring Xa.

### 3.3.2 Protein-tyrosine phosphatase (PTP) family

Protein-tyrosine kinases and protein-tyrosine phosphatases (PTPs) are controlling reversible tyrosine phosphorylation reactions which are critical for regulating metabolic and mitogenic signal transduction processes. Selective PTP inhibitors are sought for the treatment of various diseases including cancer, autoimmunity, and diabetes. Compound 1 [2-(oxalylamino)-benzoic acid or OBA] (Iversen *et al.*, 2000) and its derivatives, compound 2 and 3 (PubChem CID: 44359299 and 90765696), are highly selective toward PTP1B rather than other proteins in the family such as PTPRA, PTPRE, PTPRC and SHP1. PTP1B, PTPRC and SHP1 did not exist in the training set. And PTPRA and PTPRC only had 6 and 3 examples involving other compounds in the training set.

Results in Table 4 showed that random forest using baseline representations cannot tell target specificity within the PTP family as the proteins' Pfam descriptions are almost indistinguishable. Using novel

| Protein | Baseline rep. + RF |             |             | Novel rep. + RF |             |             | Novel rep. + DL |             |             |
|---------|--------------------|-------------|-------------|-----------------|-------------|-------------|-----------------|-------------|-------------|
|         | comp1              | comp2       | comp3       | comp1           | comp2       | comp3       | comp1           | comp2       | comp3       |
| PTP1B   | 7.80               | 7.83        | 7.80        | <b>8.38</b>     | 8.15        | <b>8.42</b> | <b>9.42</b>     | <b>8.64</b> | <b>8.11</b> |
| PTPRA   | 7.80               | 7.83        | 7.80        | 8.18            | <b>8.62</b> | 8.19        | 8.38            | 8.39        | 7.62        |
| PTPRC   | 7.81               | 7.84        | 7.81        | 8.22            | 8.49        | 8.19        | 8.41            | 8.44        | 8.03        |
| PTPRE   | 7.80               | 7.83        | 7.80        | 8.23            | 8.53        | 8.26        | 7.96            | 8.21        | 7.31        |
| SHP1    | <b>7.82</b>        | <b>7.84</b> | <b>7.84</b> | 8.09            | 8.43        | 8.13        | 8.38            | 8.26        | 7.88        |

Table 4. Predicted  $pIC_{50}$  values and target specificity for three PTP1B-selective compounds interacting with five proteins in the human PTP family.

representations, random forest correctly predicted PTP1B selectivity for compounds 1 and 3 but not compound 2, whereas unified RNN-CNN models correctly did so for all three compounds.

### 3.4 Explaining target selectivity of drugs

After successfully predicting target selectivity for some drugs, we proceed to explain using attention scores how our deep learning models did so and what they reveal about those compound-protein interactions.

#### 3.4.1 How do the compound-protein pairs interact?

Given that SPS and SMILES strings are interpretable and attention models between RNN encoders and 1D convolution layers can report their focus, we pinpoint SSEs in proteins and atoms in compounds with high attention scores, which are potentially responsible for CPIs. To assess the idea, we chose 3 compound-protein pairs that have 3D crystal complex structures from the Protein Data Bank; and extracted binding site residues (their SSEs are regarded ground truth) for each protein from ligplot diagrams provided through PDBsum (De Beer *et al.*, 2013). Based on attention scores  $\alpha_j$ 's from the single unified RNN-CNN model, we picked the top 10% (4) SSEs as predicted binding sites.

Table 5 shows that, compared to randomly ranking the SSEs, our approach can enrich binding site prediction by 1.6~2.0 fold for the three CPIs. We delved into the predictions for factor Xa–DX-9065a interaction in Fig. 3 (the other 2 are in Sec. 5 of Supplementary Data). The red  $\beta$  strand was correctly predicted to be at the binding site with a high rank 2, thus a true positive (TP). The SSE ranked first, a false positive, was its immediate

| Target-Drug            | PDB ID | Number of SSEs |              | Top 10% (4) SSEs predicted as binding site |            |                     |
|------------------------|--------|----------------|--------------|--------------------------------------------|------------|---------------------|
|                        |        | total          | binding site | # of TP                                    | Enrichment | Highest rank for TP |
| Human COX2-rofecoxib   | 5KIR   | 40             | 6            | 1                                          | 1.67       | 2                   |
| Human PTP1B-OBA        | 1C85   | 34             | 5            | 1                                          | 1.70       | 4                   |
| Human factor Xa-DX9065 | 1FAX   | 31             | 4            | 1                                          | 1.94       | 2                   |

Table 5. Interpreting deep learning models: predicting binding sites.

neighbor in sequence. Another SSE (cyan loop with two residues labeled above the compound), although a false negative ranked 11th, is structurally close to the true positive; and along with the true positive it forms the cavity to accommodate the compound. Therefore, in the current unified RNN-CNN model with attention mechanism, wrong attention could be paid to sequence neighbors of ground truth; and additional information (for instance, 2D contact maps or 3D structures of proteins, if available) could be used as additional input to reduce false negatives.

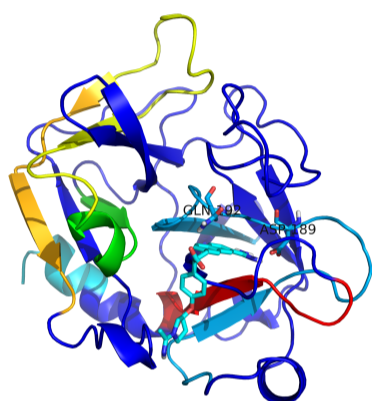

Fig. 3. Interpreting deep model for factor Xa binding: 3D structure of factor Xa (cartoon) in complex with DX-9065a (cyan sticks) (PDB ID:1FAX) and color-coded by attention scores (warmer colors for higher values).

### 3.4.2 How are targets selectively interacted?

To predictively explain the selectivity origin of compounds, we designed an approach to compare attention scores between pairs of CPIs and tested it using factor Xa-selective DX-9065a with known specificity origin.

For selective compounds that interact with factor Xa over thrombin, position 192 has been identified: it is a charge-neutral polar glutamine (Gln192) in Xa but a negatively-charged glutamate (Glu192) in thrombin (Huggins *et al.*, 2012). DX-9065a exploited this difference with a carboxylate group forming unfavorable electrostatic repulsion with Glu192 in thrombin but favorable hydrogen bond with Gln192 in Xa. To compare DX-9065a interacting with the two proteins, we performed amino-acid sequence alignment between the proteins and split two sequences of mis-matched SSEs (count: 31 and 38) into those of perfectly matched segments (count: 50 and 50). In the end, segment 42, where SSE 26 of Xa and SSE 31 of thrombin align, is the ground truth containing position 192 for target selectivity.

For DX-9065a interacting with either factor Xa or thrombin, we ranked the SSEs based on the attention scores from the unified RNN-CNN single model and assigned each segment the same rank as its parent SSE. We then calculated the rank difference for each segment between factor Xa and thrombin interactions and re-ranked the segments (Fig. 4). The ground-truth segment (black) was ranked the 4<sup>th</sup> among 50 segments.

## 4 Conclusion

We have developed accurate and interpretable deep learning models for predicting compound-protein affinity using only compound identities and

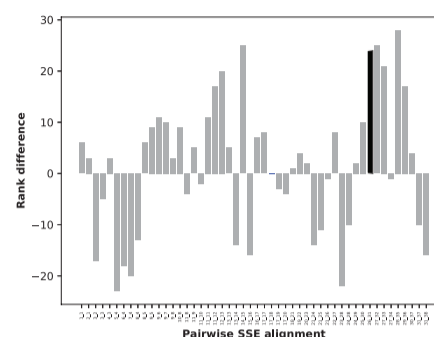

Fig. 4. Interpreting deep model for factor Xa specificity. Pairwise alignment of amino-acid sequences of factor Xa and thrombin decomposed both sequences into 50 segments (labeled by two SSE indices with a hyphen in between) and scored by the difference in attention ranks between the two compound-protein interactions. Ground truth is in black.

protein sequences. By taking advantage of massive unlabeled compound and protein data besides labeled data in semi-supervised learning, we have jointly trained unified RNN-CNN models for learning context- and task-specific protein/compound representations and predicting compound-protein affinity. These models outperform baseline machine-learning models. And impressively, they achieve the relative error of IC<sub>50</sub> within 5-fold for a comprehensive test set and even that within 10-fold for generalization sets of protein classes unknown to the training set. Deeper models would further improve the results. Moreover, for the generalization sets, we have devised transfer-learning strategies to significantly improve model performance using as few as 40 labeled samples.

Compared to conventional compound or protein representations using molecular descriptors or Pfam domains, the encoded representations learned from novel structurally-annotated SPS sequences and SMILES strings improve both predictive power and training efficiency for various machine learning models. Given the novel representations with better interpretability, we have included attention mechanism in the unified RNN-CNN models to quantify how much each part of proteins or compounds are focused while the models are making the specific prediction for each compound-protein pair. We have chosen SSE as the resolution for interpretability due to the known sequence-size limitation of RNN models (Li *et al.*, 2018). But one can easily increase the resolution to residue-level by simply feeding to our models amino-acid sequences (preferentially of length below 1,000) instead of SPS sequences.

When applied to case studies on drugs of known target-selectivity, our models have successfully predicted target selectivity in all cases whereas conventional compound/protein representations and machine learning models have failed some. Furthermore, our analyses on attention weights have shown promising results for predicting protein binding sites as well as the origins of binding selectivity, thus calling for further method development for better interpretability.

## Acknowledgments

This project is in part supported by the National Institute of General Medical Sciences of the National Institutes of Health (R35GM124952 to YS) and the Defense Advanced Research Projects Agency (FA8750-18-2-0027 to ZW). Part of the computing time is provided by the Texas A&M High Performance Research Computing.

## References

- Ain, Q. U., Aleksandrova, A., Roessler, F. D., and Ballester, P. J. (2015). Machine-learning scoring functions to improve structure-based binding affinity prediction and virtual screening. *Wiley Interdiscip Rev Comput Mol Sci*, **5**(6), 405–424.
- Brandstetter, H., Kühne, A., Bode, W., Huber, R., von der Saal, W., Wirthensohn, K., and Engh, R. A. (1996). X-ray structure of active site-inhibited clotting factor xa implications for drug design and substrate recognition. *Journal of Biological Chemistry*, **271**(47), 29988–29992.
- Cang, Z. and Wei, G. W. (2017). TopologyNet: Topology based deep convolutional and multi-task neural networks for biomolecular property predictions. *PLoS Comput. Biol.*, **13**(7), e1005690.
- Chang, R. L., Xie, L., Xie, L., Bourne, P. E., and Palsson, B. P. (2010). Drug off-target effects predicted using structural analysis in the context of a metabolic network model. *PLoS Comput. Biol.*, **6**(9), e1000938.
- Chen, X., Yan, C. C., Zhang, X., Zhang, X., Dai, F., Yin, J., and Zhang, Y. (2016). Drug-target interaction prediction: databases, web servers and computational models. *Brief. Bioinformatics*, **17**(4), 696–712.
- Cheng, F., Zhou, Y., Li, J., Li, W., Liu, G., and Tang, Y. (2012). Prediction of chemical-protein interactions: multitarget-qsar versus computational chemogenomic methods. *Molecular BioSystems*, **8**(9), 2373–2384.
- Cheng, J., Randall, A. Z., Sweredoski, M. J., and Baldi, P. (2005). Scratch: a protein structure and structural feature prediction server. *Nucleic acids research*, **33**(suppl\_2), W72–W76.
- Cheng, Z., Zhou, S., Wang, Y., Liu, H., Guan, J., and Chen, Y.-P.P. (2016). Effectively identifying compound-protein interactions by learning from positive and unlabeled examples. *IEEE/ACM transactions on computational biology and bioinformatics*.
- Cho, K., Van Merriënboer, B., Bahdanau, D., and Bengio, Y. (2014). On the properties of neural machine translation: Encoder-decoder approaches. *arXiv preprint arXiv:1409.1259*.
- De Beer, T. A., Berka, K., Thornton, J. M., and Laskowski, R. A. (2013). Pdbsum additions. *Nucleic acids research*, **42**(D1), D292–D296.
- Deerwester, S., Dumais, S. T., Furnas, G. W., Landauer, T. K., and Harshman, R. (1990). Indexing by latent semantic analysis. *Journal of the American society for information science*, **41**(6), 391.
- Finn, R. D., Bateman, A., Clements, J., Coghill, P., Eberhardt, R. Y., Eddy, S. R., Heeger, A., Hetherington, K., Holm, L., Mistry, J., Sonnhammer, E. L. L., Tate, J., and Punta, M. (2014). Pfam: the protein families database. *Nucleic Acids Research*, **42**(D1), D222–D230.
- Finn, R. D., Clements, J., Arndt, W., Miller, B. L., Wheeler, T. J., Schreiber, F., Bateman, A., and Eddy, S. R. (2015). Hmmer web server: 2015 update. *Nucleic acids research*, **43**(W1), W30–W38.
- Gilson, M. K. and Zhou, H.-X. (2007). Calculation of protein-ligand binding affinities. *Annual review of biophysics and biomolecular structure*, **36**.
- Gomes, J., Ramsundar, B., Feinberg, E. N., and Pande, V. S. (2017). Atomic convolutional networks for predicting protein-ligand binding affinity. *arXiv preprint arXiv:1703.10603*.
- Huggins, D. J., Sherman, W., and Tidor, B. (2012). Rational approaches to improving selectivity in drug design. *Journal of medicinal chemistry*, **55**(4), 1424–1444.
- Iversen, L. F., Andersen, H. S., Branner, S., Mortensen, S. B., Peters, G. H., Norris, K., Olsen, O. H., Jeppesen, C. B., Lundt, B. F., Ripka, W., et al. (2000). Structure-based design of a low molecular weight, nonphosphorus, nonpeptide, and highly selective inhibitor of protein-tyrosine phosphatase 1b. *Journal of Biological Chemistry*, **275**(14), 10300–10307.
- Jimenez, J., Skalic, M., Martinez-Rosell, G., and De Fabritiis, G. (2018). KDEEP: Protein-Ligand Absolute Binding Affinity Prediction via 3D-Convolutional Neural Networks. *J Chem Inf Model*, **58**(2), 287–296.
- Kalchbrenner, N. and Blunsom, P. (2013). Recurrent continuous translation models. In *EMNLP*, volume 3, page 413.
- Keiser, M. J., Setola, V., Irwin, J. J., Laggner, C., Abbas, A., Hufeisen, S. J., Jensen, N. H., Kuijer, M. B., Matos, R. C., Tran, T. B., et al. (2009). Predicting new molecular targets for known drugs. *Nature*, **462**(7270), 175.
- Koh, P. W. and Liang, P. (2017). Understanding black-box predictions via influence functions. In D. Precup and Y. W. Teh, editors, *Proceedings of the 34th International Conference on Machine Learning*, volume 70 of *Proceedings of Machine Learning Research*, pages 1885–1894, International Convention Centre, Sydney, Australia. PMLR.
- Kuhn, M., von Mering, C., Campillos, M., Jensen, L. J., and Bork, P. (2007). Stitch: interaction networks of chemicals and proteins. *Nucleic acids research*, **36**(suppl\_1), D684–D688.
- Leach, A. R., Shoichet, B. K., and Peishoff, C. E. (2006). Prediction of protein-ligand interactions. Docking and scoring: successes and gaps. *J. Med. Chem.*, **49**(20), 5851–5855.
- Li, S., Li, W., Cook, C., Zhu, C., and Gao, Y. (2018). Independently recurrent neural network (indrnn): Building A longer and deeper RNN. *CoRR*, [abs/1803.04831](https://arxiv.org/abs/1803.04831).
- Liu, T., Lin, Y., Wen, X., Jorissen, R. N., and Gilson, M. K. (2006). Bindingdb: a web-accessible database of experimentally determined protein-ligand binding affinities. *Nucleic acids research*, **35**(suppl\_1), D198–D201.
- Magnan, C. N. and Baldi, P. (2014). Sspro/acpro 5: almost perfect prediction of protein secondary structure and relative solvent accessibility using profiles, machine learning and structural similarity. *Bioinformatics*, **30**(18), 2592–2597.
- Mayr, A., Klambauer, G., Unterthiner, T., and Hochreiter, S. (2016). Deeptox: Toxicity prediction using deep learning. *Frontiers in Environmental Science*, **3**, 80.
- Mikolov, T., Chen, K., Corrado, G., and Dean, J. (2013). Efficient estimation of word representations in vector space. *arXiv preprint arXiv:1301.3781*.
- Power, A., Berger, A. C., and Ginsburg, G. S. (2014). Genomics-enabled drug repositioning and repurposing: insights from an IOM Roundtable activity. *JAMA*, **311**(20), 2063–2064.
- Ribeiro, M. T., Singh, S., and Guestrin, C. (2016). "why should i trust you?": Explaining the predictions of any classifier. In *Proceedings of the 22nd ACM SIGKDD International Conference on Knowledge Discovery and Data Mining, KDD '16*, pages 1135–1144, New York, NY, USA. ACM.
- Santos, R., Ursu, O., Gaulton, A., Bento, A. P., Donadi, R. S., Bologa, C. G., Karlsson, A., Al-Lazikani, B., Hersey, A., Oprea, T. I., and Overington, J. P. (2017). A comprehensive map of molecular drug targets. *Nat Rev Drug Discov*, **16**(1), 19–34.
- Shi, Y., Zhang, X., Liao, X., Lin, G., and Schuurmans, D. (2013). Protein-chemical interaction prediction via kernelized sparse learning svm. In *Pacific Symposium on Biocomputing*, pages 41–52.
- Sutskever, I., Martens, J., Dahl, G., and Hinton, G. (2013). On the importance of initialization and momentum in deep learning. In *International conference on machine learning*, pages 1139–1147.
- Sutskever, I., Vinyals, O., and Le, Q. V. (2014). Sequence to sequence learning with neural networks. In *Advances in neural information processing systems*, pages 3104–3112.
- Suzek, B. E., Wang, Y., Huang, H., McGarvey, P. B., Wu, C. H., and Consortium, U. (2014). Uniref clusters: a comprehensive and scalable alternative for improving sequence similarity searches. *Bioinformatics*, **31**(6), 926–932.
- Tabei, Y. and Yamanishi, Y. (2013). Scalable prediction of compound-protein interactions using minwise hashing. *BMC systems biology*, **7**(6), S3.
- Tian, K., Shao, M., Wang, Y., Guan, J., and Zhou, S. (2016). Boosting compound-protein interaction prediction by deep learning. *Methods*, **110**, 64–72.
- Wallach, I., Dzamba, M., and Heifets, A. (2015). Atomnet: a deep convolutional neural network for bioactivity prediction in structure-based drug discovery. *arXiv preprint arXiv:1510.02855*.
- Wan, F. and Zeng, J. (2016). Deep learning with feature embedding for compound-protein interaction prediction. *bioRxiv*, page 086033.
- Wang, S., Li, W., Liu, S., and Xu, J. (2016a). Raptorx-property: a web server for protein structure property prediction. *Nucleic Acids Research*, **44**(W1), W430–W435.
- Wang, Y. and Zeng, J. (2013). Predicting drug-target interactions using restricted Boltzmann machines. *Bioinformatics*, **29**(13), i126–134.
- Wang, Y., Xiao, J., Suzek, T. O., Zhang, J., Wang, J., and Bryant, S. H. (2009). Pubchem: a public information system for analyzing bioactivities of small molecules. *Nucleic acids research*, **37**(suppl\_2), W623–W633.
- Wang, Z., Chang, S., Yang, Y., Liu, D., and Huang, T. S. (2016b). Studying very low resolution recognition using deep networks. In *Proceedings of the IEEE Conference on Computer Vision and Pattern Recognition*, pages 4792–4800.
- Weininger, D. (1988). Smiles, a chemical language and information system. I. introduction to methodology and encoding rules. *Journal of chemical information and computer sciences*, **28**(1), 31–36.
- Xu, Z., Wang, S., Zhu, F., and Huang, J. (2017). Seq2seq fingerprint: An unsupervised deep molecular embedding for drug discovery. In *Proceedings of the 8th ACM International Conference on Bioinformatics, Computational Biology, and Health Informatics*, pages 285–294. ACM.
- Yu, H., Chen, J., Xu, X., Li, Y., Zhao, H., Fang, Y., Li, X., Zhou, W., Wang, W., and Wang, Y. (2012). A systematic prediction of multiple drug-target interactions from chemical, genomic, and pharmacological data. *PLoS one*, **7**(5), e37608.
